# Supplementary material for: Xanthohumol-Enriched Beer Does Not Exert Antitumorigenic Effects on HeLa Cell Line In Vivo
Source: MDPI journal article supplement (doi:10.3390/molecules28031070), 2023-01-20
Supplement: s1 [file s1]

**Supplementary File S1. Detailed description of the method analytical procedure for measuring the XN content of the beer tested**

**Analytical procedure**

Xanthohumol was extracted from beer using solid phase extraction column, SPE, (Strata C18-E, 500 mg/6 mL, Phenomenex). The SPE column was equilibrated by 10 mL of methanol and subsequently by 10 mL of acidified water (solution No. 1). 25 mL of beer sample was defoamed by sonification and acidified by 0.1 mL of H<sub>3</sub>PO<sub>4</sub> and then the sample was applied on conditioned SPE column. Using of 10 mL of solution No. 2, more polar impurities were discarded. Analytes were eluted by solution No. 3 into final volume 2.5 mL after 5 minutes of air drying-up.

**Chemicals**

Reference standard xanthohumol was from AAPIN Chemicals Limited (UK).

Calibration solutions: stock standard solution was prepared by weighting out 0.2–1.0 mg ± 0.1 mg exactly of each compound into a 5 mL volumetric flask and made the contents up to volume with gradient grade methanol (Merck) at 20 °C. Calibration solutions were prepared by dilution of stock standard 10×, 50×, 100× and 1000 × into the 10 mL beakers in methanol. Flasks were stoppered and mixed by inversion at least four times.

Other solutions were prepared using deionized water (Millipore. TOC < 5 ppb), methanol analytical-reagent grade (Merck) and 85 % H<sub>3</sub>PO<sub>4</sub> analytical-reagent grade (Merck) and acetone analytical – reagent grade (Lachner).

For extraction of beers:

1. deionized water acidified H<sub>3</sub>PO<sub>4</sub> (100:0.2, v/v)
2. methanol + water +H<sub>3</sub>PO<sub>4</sub> (20:80:0.2, v/v/v)
3. acidified methanol H<sub>3</sub>PO<sub>4</sub> (100 : 0.2, v/v)

For other details see <https://www.kvasnyprumysl.cz/pdfs/kpr/2013/02/02.pdf>

### HPLC analysis

Mobile phase:

A – deaerated demineralized water (0.05 % wt. formic acid)

B – deaerated acetonitrile (0.05 % wt. formic acid)

Gradient (Table 1):

From 0 to 42 minutes the proportion of mobile phase B linearly increased from 35 % to 95 % vol.

**Table 1.** Gradient of mobile phases (% vol.)

| Time (min) | A  | B  |
|------------|----|----|
| 0          | 65 | 35 |
| 40         | 38 | 62 |
| 42         | 5  | 95 |
| 47         | 5  | 95 |

Temperature: 30 °C

Flow rate: 0,8 ml/min

Detector: PDA (Absorbance of xanthohumolu was detected at 370 nm).

Injection: 10 µL

Analytical equipment: HPLC chromatograph 1100 Series (Agilent, USA), PDA detektor (Agilent, USA), Column ECLIPSE XDB-C18, 5 µm, 4.6 x 150 mm (Agilent, USA)

**Supplementary Table S1.** Individual terminal body weight and tumour masses of the mice per group

| Group | TBW (g) | TTW (g) | TLW (g) |
|-------|---------|---------|---------|
| A1    | 27.4    | 1.4     | 1.4     |
| A2    | 24.6    | 0.9     | 1.2     |
| A3    | 26.5    | 0.8     | 1.4     |
| A4    | 25.8    | 0.9     | 1.3     |
| A5    | 26.4    | 1.1     | 1.3     |
| A6    | 25.3    | 1.2     | 1.2     |
| A7    | 24.9    | 0.9     | 1.1     |
| A8    | 26.4    | 1.4     | 1.3     |
| A9    | 27      | 1.2     | 1.5     |
| A10   | 26.4    | 1       | 1.3     |
| B1    | 25.4    | 1.2     | 1.3     |
| B2    | 26.4    | 1       | 1.4     |
| B3    | 24.8    | 1.1     | 1.3     |
| B4    | 24.5    | 1.1     | 1.3     |
| B5    | 25.3    | 1.3     | 1.4     |
| B6    | 26.2    | 0.7     | 1.5     |
| B7    | 25.8    | 1       | 1.4     |
| B8    | 25      | 0.7     | 1.2     |
| B9    | 26.2    | 1       | 1.4     |
| B10   | 24.9    | 0.8     | 1.2     |
| C1    | 25.4    | 1.2     | 1.3     |
| C2    | 26.1    | 1       | 1.4     |
| C3    | 25.7    | 0.8     | 1.3     |
| C4    | 24      | 1       | 1.3     |
| C5    | 24.8    | 0.7     | 1.4     |
| C6    | 25.6    | 0.9     | 1.5     |
| C7    | 24.5    | 1.5     | 1.4     |
| C8    | 26.1    | 1.4     | 1.2     |
| C9    | 25.4    | 1.2     | 1.4     |
| C10   | 24.7    | 1.4     | 1.2     |
| D1    | 24.6    | 1.3     | 1.4     |
| D2    | 25.4    | 1.2     | 1.5     |
| D3    | 25.8    | 0.8     | 1.6     |
| D4    | 25.2    | 1.2     | 1.6     |
| D5    | 24.4    | 1.7     | 1.4     |
| D6    | 23.8    | 1.8     | 1.4     |
| D7    | 24.6    | 1.5     | 1.5     |
| D8    | 24.4    | 1.1     | 1.4     |
| D9    | 25.2    | 1.4     | 1.6     |
| D10   | 26      | 0.8     | 1.7     |

Group A: beer+xanthohumol; Group B: ethanolic water+xanthohumol; Group C: beer; Group D: ethanolic water  
Abbreviations: TBW: terminal body weight; TTW: terminal tumour weight; TLW: terminal liver weight

**Supplementary Table S2.** Replicate results of plasma antioxidant capacity measured by FRAP method in each group

| Group                        | Plasma antioxidant capacity FRAP (mg ASE/L) |        |        |        |        |
|------------------------------|---------------------------------------------|--------|--------|--------|--------|
|                              | Replicate measurements                      |        |        |        |        |
| Beer+xanthohumol             | 265.83                                      | 298.03 | 297.38 | 288.94 | 279.85 |
| Ethanollic water+xanthohumol | 291.80                                      | 317.51 | 316.99 | 302.71 | 313.48 |
| Beer                         | 275.96                                      | 278.55 | 304.52 | 289.59 | 271.15 |
| Ethanollic water             | 304.78                                      | 327.64 | 336.08 | 322.57 | 318.16 |

**Supplementary Table S3.** Replicate results of plasma antioxidant capacity measured by ABTS method in each group

| Group                        | Plasma antioxidant capacity ABTS (μmol TE/L) |        |        |        |
|------------------------------|----------------------------------------------|--------|--------|--------|
|                              | Replicate measurements                       |        |        |        |
| Beer+xanthohumol             | 862.87                                       | 864.11 | 917.23 |        |
| Ethanollic water+xanthohumol | 832.04                                       | 837.46 | 823.06 | 874.64 |
| Beer                         | 914.44                                       | 929.01 | 950.38 | 953.79 |
| Ethanollic water             | 986.78                                       | 998.71 | 973.77 | 999.64 |

**Supplementary Table S4.** Descriptive statistics of the measured parameters

| Descriptive Statistics |       |        |                |                  |        |                |                                  |          |                |                                    |          |                |    |
|------------------------|-------|--------|----------------|------------------|--------|----------------|----------------------------------|----------|----------------|------------------------------------|----------|----------------|----|
| Tumor weight (g)       |       |        |                | Liver weight (g) |        |                | Antioxidant capacity mg/L (FRAP) |          |                | Antioxidant capacity μmol/L (ABTS) |          |                |    |
| Liquid matrix          |       | Mean   | Std. Deviation | N                | Mean   | Std. Deviation | N                                | Mean     | Std. Deviation | N                                  | Mean     | Std. Deviation | N  |
| Beer                   | XN    | 1.0800 | .21499         | 10               | 1.3000 | .11547         | 10                               | 286.0077 | 13.48696       | 5                                  | 881.4021 | 31.03761       | 3  |
|                        | Yes   |        |                |                  |        |                |                                  |          |                |                                    |          |                |    |
|                        | XN    | 1.1100 | .27264         | 10               | 1.3400 | .09661         | 10                               | 283.9562 | 13.34022       | 5                                  | 936.9056 | 18.56051       | 4  |
|                        | No    |        |                |                  |        |                |                                  |          |                |                                    |          |                |    |
|                        | Total | 1.0950 | .23946         | 20               | 1.3200 | .10563         | 20                               | 284.9820 | 12.69278       | 10                                 | 913.1184 | 37.06129       | 7  |
| Ethanollic water       | XN    | .9900  | .20248         | 10               | 1.3400 | .09661         | 10                               | 308.4970 | 11.07410       | 5                                  | 841.8011 | 22.68329       | 4  |
|                        | Yes   |        |                |                  |        |                |                                  |          |                |                                    |          |                |    |
|                        | XN    | 1.2800 | .33599         | 10               | 1.5100 | .11005         | 10                               | 321.8451 | 11.63283       | 5                                  | 989.7243 | 12.14046       | 4  |
|                        | no    |        |                |                  |        |                |                                  |          |                |                                    |          |                |    |
|                        | Total | 1.1350 | .30826         | 20               | 1.4250 | .13328         | 20                               | 315.1711 | 12.81173       | 10                                 | 915.7627 | 80.84228       | 8  |
| Total                  | XN    | 1.0350 | .20844         | 20               | 1.3200 | .10563         | 20                               | 297.2524 | 16.60841       | 10                                 | 858.7730 | 32.03821       | 7  |
|                        | Yes   |        |                |                  |        |                |                                  |          |                |                                    |          |                |    |
|                        | XN    | 1.1950 | .31031         | 20               | 1.4250 | .13328         | 20                               | 302.9007 | 23.19500       | 10                                 | 963.3149 | 31.74737       | 8  |
|                        | No    |        |                |                  |        |                |                                  |          |                |                                    |          |                |    |
|                        | Total | 1.1150 | .27321         | 40               | 1.3725 | .13006         | 40                               | 300.0765 | 19.84697       | 20                                 | 914.5287 | 62.11490       | 15 |

**Supplementary Table S5.** Testo of between-subject effects of tumor weight**Tests of Between-Subjects Effects**

Dependent Variable: tumor weight

| Source                      | Type III Sum of Squares | df | Mean Square | F       | Sig. | Partial Eta Squared |
|-----------------------------|-------------------------|----|-------------|---------|------|---------------------|
| Corrected Model             | .441 <sup>a</sup>       | 3  | .147        | 2.143   | .112 | .151                |
| Intercept                   | 49.729                  | 1  | 49.729      | 724.795 | .000 | .953                |
| Liquid matrix               | .016                    | 1  | .016        | .233    | .632 | .006                |
| Xanthohumol                 | .256                    | 1  | .256        | 3.731   | .061 | .094                |
| Liquid matrix * Xanthohumol | .169                    | 1  | .169        | 2.463   | .125 | .064                |
| Error                       | 2.470                   | 36 | .069        |         |      |                     |
| Total                       | 52.640                  | 40 |             |         |      |                     |
| Corrected Total             | 2.911                   | 39 |             |         |      |                     |

*a. R Squared = .151 (Adjusted R Squared = .081)***Supplementary Table S6.** Testo of between-subject effects of Antioxidant capacity measured by FRAP**Tests of Between-Subjects Effects**

Dependent Variable: FRAP

| Source                      | Type III Sum of Squares | df | Mean Square | F         | Sig. | Partial Eta Squared |
|-----------------------------|-------------------------|----|-------------|-----------|------|---------------------|
| Corrected Model             | 5012.871 <sup>a</sup>   | 3  | 1670.957    | 10.818    | .000 | .670                |
| Intercept                   | 1800918.326             | 1  | 1800918.326 | 11659.868 | .000 | .999                |
| Xanthohumol                 | 159.516                 | 1  | 159.516     | 1.033     | .325 | .061                |
| Liquid matrix               | 4556.916                | 1  | 4556.916    | 29.503    | .000 | .648                |
| Xanthohumol * Liquid matrix | 296.438                 | 1  | 296.438     | 1.919     | .185 | .107                |
| Error                       | 2471.271                | 16 | 154.454     |           |      |                     |
| Total                       | 1808402.467             | 20 |             |           |      |                     |
| Corrected Total             | 7484.142                | 19 |             |           |      |                     |

*a. R Squared = .670 (Adjusted R Squared = .608)*

**Supplementary Table S7.** Test of between-subject effects of Antioxidant capacity measured by ABTS**Tests of Between-Subjects Effects**

Dependent Variable: ABTS

| Source                      | Type III Sum of Squares | df | Mean Square  | F         | Sig. | Partial Eta Squared |
|-----------------------------|-------------------------|----|--------------|-----------|------|---------------------|
| Corrected Model             | 49069.741 <sup>a</sup>  | 3  | 16356.580    | 36.378    | .000 | .908                |
| Intercept                   | 12296567.589            | 1  | 12296567.589 | 27348.291 | .000 | 1.000               |
| Xanthohumol                 | 38199.149               | 1  | 38199.149    | 84.957    | .000 | .885                |
| Liquid matrix               | 161.265                 | 1  | 161.265      | .359      | .561 | .032                |
| Xanthohumol * Liquid matrix | 7884.376                | 1  | 7884.376     | 17.535    | .002 | .615                |
| Error                       | 4945.912                | 11 | 449.628      |           |      |                     |
| Total                       | 12599456.251            | 15 |              |           |      |                     |
| Corrected Total             | 54015.653               | 14 |              |           |      |                     |

*a. R Squared = .908 (Adjusted R Squared = .883)***Supplementary Table S8.** Test of between-subject effects of Liver weights**Tests of Between-Subjects Effects**

Dependent Variable: Liverweight

| Source          | Type III Sum of Squares | df | Mean Square | F        | Sig. | Partial Eta Squared |
|-----------------|-------------------------|----|-------------|----------|------|---------------------|
| Corrected Model | .263 <sup>a</sup>       | 3  | .088        | 7.942    | .000 | .398                |
| Intercept       | 75.350                  | 1  | 75.350      | 6832.768 | .000 | .995                |
| Matrix          | .110                    | 1  | .110        | 9.997    | .003 | .217                |
| xn              | .110                    | 1  | .110        | 9.997    | .003 | .217                |
| Matrix * xn     | .042                    | 1  | .042        | 3.831    | .058 | .096                |
| Error           | .397                    | 36 | .011        |          |      |                     |
| Total           | 76.010                  | 40 |             |          |      |                     |
| Corrected Total | .660                    | 39 |             |          |      |                     |

*a. R Squared = .398 (Adjusted R Squared = .348)*

**Supplementary Figure S1.** Calibration curve of xanthohumol

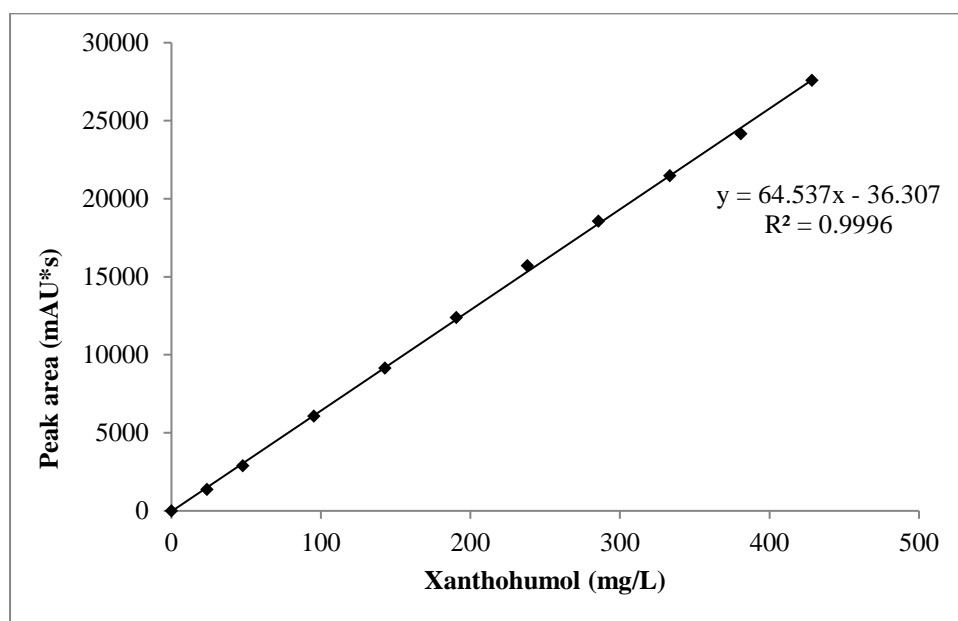

Retention time of xanthohumol 31.49 min.

Reproducibility of xanthohumol determination 2.53 % rel.
